# Supplementary material
Source: publisher site journal article supplement (https://neobiota.pensoft.net/article/69716/download/suppl/32/)
Supplement: Supplementary file 1

## Sheet: Table 1_ABUTH
Supplementary file 2 Geographical distribution data of the studied invasive alien speces. Anđelković et al. "Riparian areas as conduits of plant invasions in Serbia (Middle Danube Basin area)"
Species	Locality (catchment area)	Locality (river/canal section)	Locality (city/village)	Latitude	Longitude	Recorded by
Abuthilon theophrasti Medik.	Danube	Begej	Klek	45.4401	20.4578	Anđelković, A.
Abuthilon theophrasti Medik.	Danube	Dunav	Sremski Karlovci	45.204	19.9426	Anđelković, A.
Abuthilon theophrasti Medik.	Danube	Dunav	Novi Banovci	44.9605	20.2853	Anđelković, A.
Abuthilon theophrasti Medik.	Danube	Dunav	Vinci	44.6989	21.6045	Anđelković, A.
Abuthilon theophrasti Medik.	Danube	Jegrička	Ravno Selo	45.4532	19.6142	Anđelković, A.
Abuthilon theophrasti Medik.	Danube	Karaš	Kuštilj	45.0341	21.3819	Anđelković, A.
Abuthilon theophrasti Medik.	Danube	Mlava	Izvarica - Ribare	44.2292	21.6905	Anđelković, A.
Abuthilon theophrasti Medik.	Danube	Mlava	Malo Crniće	44.5444	21.2792	Anđelković, A.
Abuthilon theophrasti Medik.	Danube	Nera	Kusić 2	44.8699	21.4398	Anđelković, A.
Abuthilon theophrasti Medik.	Danube	Nera	Stara Palanka	44.833	21.3547	Anđelković, A.
Abuthilon theophrasti Medik.	Sava	Topčiderska reka	Topčider park	44.7788	20.4395	Anđelković, A.
Abuthilon theophrasti Medik.	Zapadna Morava	Zapadna Morava	Čukojevac	43.7064	20.8289	Anđelković, A.
Abuthilon theophrasti Medik.	Zapadna Morava	Zapadna Morava	Ovčar Banja	43.8965	20.1861	Anđelković, A.
Abuthilon theophrasti Medik.	Zapadna Morava	Zapadna Morava	Kukljin	43.6024	21.2336	Anđelković, A.
Abuthilon theophrasti Medik.	Južna Morava	Kutinska reka	Krastavče	43.1806	22.0447	Anđelković, A.
Abuthilon theophrasti Medik.	Danube-Tisa-Danube hydrosystem	Banatska Palanka - Novi Bečej	Botoš	45.3183	20.6386	Anđelković, A.
Abuthilon theophrasti Medik.	Danube-Tisa-Danube hydrosystem	Karavukovo - Bački Petrovac	Odžaci	45.5338	19.2389	Anđelković, A.

## Sheet: Table 2_ACRNE
Supplementary file 2 Geographical distribution data of the studied invasive alien speces. Anđelković et al. "Riparian areas as conduits of plant invasions in Serbia (Middle Danube Basin area)"
Species	Locality (catchment area)	Locality (river/canal section)	Locality (city/village)	Latitude	Longitude	Recorded by
Acer negundo L.	Danube	Dunav	Belegiš	45.0239	20.3536	Anđelković, A.
Acer negundo L.	Danube	Dunav	Zemun	44.8502	20.4097	Anđelković, A.
Acer negundo L.	Danube	Dunav	Vinča	44.769	20.6188	Anđelković, A.
Acer negundo L.	Danube	Dunav	Ritopek	44.7385	20.6591	Anđelković, A.
Acer negundo L.	Danube	Dunav	Grocka	44.6801	20.7176	Anđelković, A.
Acer negundo L.	Danube	Dunav	Kovin - Malo Bavanište	44.7272	21.0194	Anđelković, A.
Acer negundo L.	Danube	Dunav	Dubovac	44.7886	21.2135	Anđelković, A.
Acer negundo L.	Danube	Dunav	Ram	44.8161	21.3332	Anđelković, A.
Acer negundo L.	Danube	Dunav	Vinci	44.6989	21.6045	Anđelković, A.
Acer negundo L.	Danube	Dunav	Srebrno jezero	44.773	21.4666	Anđelković, A.
Acer negundo L.	Danube	Dunav	Golubac	44.6529	21.6389	Anđelković, A.
Acer negundo L.	Danube	Jegrička	Zmajevo	45.4535	19.6877	Anđelković, A.
Acer negundo L.	Danube	Nera	Stara Palanka	44.833	21.3547	Anđelković, A.
Acer negundo L.	Danube	Tamiš	Pančevo	44.8707	20.6322	Anđelković, A.
Acer negundo L.	Danube	Tamiš	Jabuka	44.9447	20.5971	Anđelković, A.
Acer negundo L.	Danube	Tamiš	Opovo	45.0511	20.4187	Anđelković, A.
Acer negundo L.	Danube	Tisa	Ada	45.7992	20.1478	Anđelković, A.
Acer negundo L.	Danube	Tisa	Most ZR - Žabalj	45.3933	20.2053	Anđelković, A.
Acer negundo L.	Danube	Tisa	Kanjiža	46.0733	20.0585	Anđelković, A.
Acer negundo L.	Sava	Sava	Ostružnica	44.727	20.3108	Anđelković, A.
Acer negundo L.	Sava	Topčiderska reka	Pinosava	44.6808	20.4822	Anđelković, A.
Acer negundo L.	Sava	Topčiderska reka	Topčider park	44.7788	20.4395	Anđelković, A.
Acer negundo L.	Velika Morava	Belica	Jagodina	43.9772	21.2575	Anđelković, A.
Acer negundo L.	Velika Morava	Resava	Dvorište	44.0959	21.5067	Anđelković, A.
Acer negundo L.	Zapadna Morava	Zapadna Morava	Čačak	43.8985	20.3502	Anđelković, A.
Acer negundo L.	Zapadna Morava	Čemernica	Preljina	43.9154	20.4001	Anđelković, A.
Acer negundo L.	Južna Morava	Kutinska reka	Krastavče	43.1806	22.0447	Anđelković, A.
Acer negundo L.	Timok	Beli Timok	Debelica	43.6659	22.2656	Anđelković, A.

## Sheet: Table 3_AILAL
Supplementary file 2 Geographical distribution data of the studied invasive alien speces. Anđelković et al. "Riparian areas as conduits of plant invasions in Serbia (Middle Danube Basin area)"
Species	Locality (catchment area)	Locality (river/canal section)	Locality (city/village)	Latitude	Longitude	Recorded by
Ailanthus altissima (Mill.) Swingle	Danube	Danube	Novi Banovci	44.9605	20.2853	Anđelković, A.
Ailanthus altissima (Mill.) Swingle	Danube	Danube	Golubac	44.6529	21.6389	Anđelković, A.
Ailanthus altissima (Mill.) Swingle	Danube	Jegrička	Zmajevo	45.4535	19.6877	Anđelković, A.
Ailanthus altissima (Mill.) Swingle	Danube	Jegrička	Ravno Selo	45.4532	19.6142	Anđelković, A.
Ailanthus altissima (Mill.) Swingle	Danube	Krivaja	Srbobran1	45.5604	19.7841	Anđelković, A.
Ailanthus altissima (Mill.) Swingle	Danube	Krivaja	Feketić	45.6582	19.7068	Anđelković, A.
Ailanthus altissima (Mill.) Swingle	Danube	Krivaja	Mali Iđoš	45.7105	19.6598	Anđelković, A.
Ailanthus altissima (Mill.) Swingle	Sava	Bosut	Morović	45.0204	19.2232	Anđelković, A.
Ailanthus altissima (Mill.) Swingle	Sava	Studva	Morović	45.0075	19.2168	Anđelković, A.
Ailanthus altissima (Mill.) Swingle	Sava	Topčiderska reka	Pinosava	44.6808	20.4822	Anđelković, A.
Ailanthus altissima (Mill.) Swingle	Sava	Topčiderska reka	Rakovica	44.7534	20.4465	Anđelković, A.
Ailanthus altissima (Mill.) Swingle	Zapadna Morava	Zapadna Morava	Kukljin	43.6024	21.2336	Anđelković, A.
Ailanthus altissima (Mill.) Swingle	Zapadna Morava	Ribnica	Trešnjar	43.6765	20.6905	Anđelković, A.
Ailanthus altissima (Mill.) Swingle	Zapadna Morava	Ribnica	Kraljevo	43.7092	20.6959	Anđelković, A.
Ailanthus altissima (Mill.) Swingle	Zapadna Morava	Ribnica	Kamenica	43.612	20.7013	Anđelković, A.
Ailanthus altissima (Mill.) Swingle	Južna Morava	Kutinska reka	Gadžin Han	43.1946	22.0226	Anđelković, A.
Ailanthus altissima (Mill.) Swingle	Južna Morava	Kutinska reka	Kutin	43.277	21.9862	Anđelković, A.
Ailanthus altissima (Mill.) Swingle	Južna Morava	Nišava	Niš	43.3204	21.9478	Anđelković, A.
Ailanthus altissima (Mill.) Swingle	Južna Morava	Nišava	Bela Palanka	43.2322	22.3206	Anđelković, A.
Ailanthus altissima (Mill.) Swingle	Južna Morava	Nišava	Crnoklište	43.2216	22.4624	Anđelković, A.
Ailanthus altissima (Mill.) Swingle	Južna Morava	Toplica	Prokuplje	43.2231	21.6008	Anđelković, A.
Ailanthus altissima (Mill.) Swingle	Timok	Beli Timok	Grljan	43.8556	22.2972	Anđelković, A.
Ailanthus altissima (Mill.) Swingle	Timok	Beli Timok	Mali Beograd	43.7908	22.3085	Anđelković, A.
Ailanthus altissima (Mill.) Swingle	Timok	Beli Timok	Borovac	43.7378	22.2982	Anđelković, A.
Ailanthus altissima (Mill.) Swingle	Timok	Beli Timok	put ka Vrbici	43.7107	22.2844	Anđelković, A.
Ailanthus altissima (Mill.) Swingle	Timok	Beli Timok	Debelica	43.6659	22.2656	Anđelković, A.
Ailanthus altissima (Mill.) Swingle	Timok	Grliška reka	Grlište	43.8137	22.2436	Anđelković, A.
Ailanthus altissima (Mill.) Swingle	Timok	Crni Timok	Gamzigradska banja	43.9241	22.1717	Anđelković, A.
Ailanthus altissima (Mill.) Swingle	Danube-Tisa-Danube hydrosystem	Novi Sad - Savino Selo	Kulpin	45.3882	19.5839	Anđelković, A.

## Sheet: Table 4_AMARE
Supplementary file 2 Geographical distribution data of the studied invasive alien speces. Anđelković et al. "Riparian areas as conduits of plant invasions in Serbia (Middle Danube Basin area)"
Species	Locality (catchment area)	Locality (river/canal section)	Locality (city/village)	Latitude	Longitude	Recorded by
Amaranthus retroflexus L.	Danube	Begej	Itebej	45.5581	20.7165	Anđelković, A.
Amaranthus retroflexus L.	Danube	Begej	Torak	45.5119	20.604	Anđelković, A.
Amaranthus retroflexus L.	Danube	Begej	Žitište	45.4886	20.547	Anđelković, A.
Amaranthus retroflexus L.	Danube	Begej	Klek	45.4401	20.4578	Anđelković, A.
Amaranthus retroflexus L.	Danube	Danube	Sremski Karlovci	45.204	19.9426	Anđelković, A.
Amaranthus retroflexus L.	Danube	Danube	Begeč	45.2204	19.6166	Anđelković, A.
Amaranthus retroflexus L.	Danube	Danube	Novi Banovci	44.9605	20.2853	Anđelković, A.
Amaranthus retroflexus L.	Danube	Danube	Vinča	44.769	20.6188	Anđelković, A.
Amaranthus retroflexus L.	Danube	Danube	Ritopek	44.7385	20.6591	Anđelković, A.
Amaranthus retroflexus L.	Danube	Danube	Grocka	44.6801	20.7176	Anđelković, A.
Amaranthus retroflexus L.	Danube	Danube	Dubovac	44.7886	21.2135	Anđelković, A.
Amaranthus retroflexus L.	Danube	Danube	Orešac	44.6554	20.8196	Anđelković, A.
Amaranthus retroflexus L.	Danube	Danube	Ram	44.8161	21.3332	Anđelković, A.
Amaranthus retroflexus L.	Danube	Danube	Golubac	44.6529	21.6389	Anđelković, A.
Amaranthus retroflexus L.	Danube	Jegrička	Ravno Selo	45.4532	19.6142	Anđelković, A.
Amaranthus retroflexus L.	Danube	Jegrička	Sirig	45.4553	19.8091	Anđelković, A.
Amaranthus retroflexus L.	Danube	Jegrička	Temerin	45.4672	19.9136	Anđelković, A.
Amaranthus retroflexus L.	Danube	Jegrička	Gospođinci	45.4182	19.9998	Anđelković, A.
Amaranthus retroflexus L.	Danube	Karaš	Kuštilj	45.0341	21.3819	Anđelković, A.
Amaranthus retroflexus L.	Danube	Krivaja	Srbobran1	45.5604	19.7841	Anđelković, A.
Amaranthus retroflexus L.	Danube	Krivaja	Srbobran 2	45.552	19.7966	Anđelković, A.
Amaranthus retroflexus L.	Danube	Krivaja	Mali Iđoš	45.7105	19.6598	Anđelković, A.
Amaranthus retroflexus L.	Danube	Krivaja	Bačka Topola	45.8094	19.631	Anđelković, A.
Amaranthus retroflexus L.	Danube	Mlava	Izvarica - Ribare	44.2292	21.6905	Anđelković, A.
Amaranthus retroflexus L.	Danube	Mlava	Šetonje	44.2826	21.5094	Anđelković, A.
Amaranthus retroflexus L.	Danube	Mlava	Petrovac na Mlavi	44.3728	21.4214	Anđelković, A.
Amaranthus retroflexus L.	Danube	Mlava	Trnovče	44.4181	21.3651	Anđelković, A.
Amaranthus retroflexus L.	Danube	Mlava	Malo Crniće	44.5444	21.2792	Anđelković, A.
Amaranthus retroflexus L.	Danube	Nera	Kusić	44.871	21.473	Anđelković, A.
Amaranthus retroflexus L.	Danube	Nera	Stara Palanka	44.833	21.3547	Anđelković, A.
Amaranthus retroflexus L.	Danube	Rojga	Plandište	45.2285	21.136	Anđelković, A.
Amaranthus retroflexus L.	Danube	Tamiš	Sečanj	45.3581	20.7704	Anđelković, A.
Amaranthus retroflexus L.	Danube	Tamiš	Jaša Tomić	45.4439	20.8728	Anđelković, A.
Amaranthus retroflexus L.	Danube	Tisa	Ada	45.7992	20.1478	Anđelković, A.
Amaranthus retroflexus L.	Danube	Tisa	Bečej	45.6095	20.058	Anđelković, A.
Amaranthus retroflexus L.	Danube	Tisa	Most ZR - Žabalj	45.3933	20.2053	Anđelković, A.
Amaranthus retroflexus L.	Danube	Tisa	Titel	45.1994	20.3118	Anđelković, A.
Amaranthus retroflexus L.	Danube	Tisa	Senta	45.9345	20.0915	Anđelković, A.
Amaranthus retroflexus L.	Danube	Tisa	Kanjiža	46.0733	20.0585	Anđelković, A.
Amaranthus retroflexus L.	Sava	Bosut	Batrovci	45.0529	19.1237	Anđelković, A.
Amaranthus retroflexus L.	Sava	Sava	Hrtkovci	44.8898	19.7516	Anđelković, A.
Amaranthus retroflexus L.	Sava	Sava	Provo	44.6898	19.9094	Anđelković, A.
Amaranthus retroflexus L.	Sava	Sava	Sremska Mitrovica	44.9616	19.6132	Anđelković, A.
Amaranthus retroflexus L.	Sava	Sava	Beograd - Ada	44.7727	20.3609	Anđelković, A.
Amaranthus retroflexus L.	Sava	Topčiderska reka	Rakovica	44.7534	20.4465	Anđelković, A.
Amaranthus retroflexus L.	Kolubara	Ub	Dokmir	44.4149	19.9755	Anđelković, A.
Amaranthus retroflexus L.	Kolubara	Ub	Gunjevac	44.4483	20.0492	Anđelković, A.
Amaranthus retroflexus L.	Drina	Jadar	Draginac	44.5053	19.4124	Anđelković, A.
Amaranthus retroflexus L.	Drina	Jadar	Komirić	44.4136	19.5377	Anđelković, A.
Amaranthus retroflexus L.	Drina	Lim	Priboj	43.5531	19.5432	Anđelković, A.
Amaranthus retroflexus L.	Drina	Lim	Kolovrat	43.3729	19.6304	Anđelković, A.
Amaranthus retroflexus L.	Drina	Lim	Brodarevo	43.2338	19.7185	Anđelković, A.
Amaranthus retroflexus L.	Drina	Štira	Zajača - pre	44.4457	19.2532	Anđelković, A.
Amaranthus retroflexus L.	Velika Morava	Belica	Belica	43.9402	21.1254	Anđelković, A.
Amaranthus retroflexus L.	Velika Morava	Crnica	Paraćin	43.8632	21.4103	Anđelković, A.
Amaranthus retroflexus L.	Velika Morava	Crnica	Zabrega	43.9345	21.5203	Anđelković, A.
Amaranthus retroflexus L.	Velika Morava	Resava	Dvorište	44.0959	21.5067	Anđelković, A.
Amaranthus retroflexus L.	Velika Morava	Resava	Despotovac	44.097	21.4519	Anđelković, A.
Amaranthus retroflexus L.	Velika Morava	Resava	Plažane	44.1349	21.4017	Anđelković, A.
Amaranthus retroflexus L.	Velika Morava	Resava	Lukovica	44.2205	21.2581	Anđelković, A.
Amaranthus retroflexus L.	Zapadna Morava	Zapadna Morava	Čukojevac	43.7064	20.8289	Anđelković, A.
Amaranthus retroflexus L.	Zapadna Morava	Zapadna Morava	Oplanići	43.7663	20.6646	Anđelković, A.
Amaranthus retroflexus L.	Zapadna Morava	Zapadna Morava	Mrčajevci	43.8332	20.503	Anđelković, A.
Amaranthus retroflexus L.	Zapadna Morava	Zapadna Morava	Čačak	43.8985	20.3502	Anđelković, A.
Amaranthus retroflexus L.	Zapadna Morava	Zapadna Morava	Riđage	43.8993	20.2735	Anđelković, A.
Amaranthus retroflexus L.	Zapadna Morava	Zapadna Morava	Ovčar Banja	43.8965	20.1861	Anđelković, A.
Amaranthus retroflexus L.	Zapadna Morava	Zapadna Morava	Šanac	43.6206	21.3471	Anđelković, A.
Amaranthus retroflexus L.	Zapadna Morava	Zapadna Morava	Kukljin	43.6024	21.2336	Anđelković, A.
Amaranthus retroflexus L.	Zapadna Morava	Zapadna Morava	Vrnjci	43.6539	20.9225	Anđelković, A.
Amaranthus retroflexus L.	Zapadna Morava	Zapadna Morava	Medveđa	43.6252	21.0742	Anđelković, A.
Amaranthus retroflexus L.	Zapadna Morava	Čemernica	Konjevići	43.9014	20.4042	Anđelković, A.
Amaranthus retroflexus L.	Zapadna Morava	Čemernica	Preljina	43.9154	20.4001	Anđelković, A.
Amaranthus retroflexus L.	Južna Morava	Vlasina	Stajkovce	42.983	22.0598	Anđelković, A.
Amaranthus retroflexus L.	Južna Morava	Vlasina	Donji Dejan	42.9797	22.2079	Anđelković, A.
Amaranthus retroflexus L.	Južna Morava	Kutinska reka	Kutin	43.277	21.9862	Anđelković, A.
Amaranthus retroflexus L.	Južna Morava	Nišava	Prosek	43.3079	22.0325	Anđelković, A.
Amaranthus retroflexus L.	Južna Morava	Nišava	Krupac	43.2937	22.2213	Anđelković, A.
Amaranthus retroflexus L.	Južna Morava	Nišava	Crnoklište	43.2216	22.4624	Anđelković, A.
Amaranthus retroflexus L.	Južna Morava	Toplica	Prokuplje	43.2231	21.6008	Anđelković, A.
Amaranthus retroflexus L.	Južna Morava	Toplica	Vlahovo	43.2111	21.6478	Anđelković, A.
Amaranthus retroflexus L.	Timok	Beli Timok	put ka Vrbici	43.7107	22.2844	Anđelković, A.
Amaranthus retroflexus L.	Danube-Tisa-Danube hydrosystem	Banatska Palanka - Novi Bečej	Botoš	45.3183	20.6386	Anđelković, A.
Amaranthus retroflexus L.	Danube-Tisa-Danube hydrosystem	Bečej-Bogojevo	Bačko Gradište	45.5358	20.0215	Anđelković, A.
Amaranthus retroflexus L.	Danube-Tisa-Danube hydrosystem	Novi Sad - Savino Selo	Despotovo	45.4574	19.5463	Anđelković, A.
Amaranthus retroflexus L.	Danube-Tisa-Danube hydrosystem	Novi Sad - Savino Selo	Novi Sad	45.2742	19.8492	Anđelković, A.
Amaranthus retroflexus L.	Danube-Tisa-Danube hydrosystem	Veliki Bački kanal	Sombor	45.7363	19.1397	Anđelković, A.

## Sheet: Table 5_AMBEL
Supplementary file 2 Geographical distribution data of the studied invasive alien speces. Anđelković et al. "Riparian areas as conduits of plant invasions in Serbia (Middle Danube Basin area)"
Species	Locality (catchment area)	Locality (river/canal section)	Locality (city/village)	Latitude	Longitude	Recorded by
Ambrosia artemisiifolia L.	Danube	Begej	Mužlja	45.3595	20.3995	Anđelković, A.
Ambrosia artemisiifolia L.	Danube	Begej	Torak	45.5119	20.604	Anđelković, A.
Ambrosia artemisiifolia L.	Danube	Danube	Novi Sad	45.2289	19.8326	Anđelković, A.
Ambrosia artemisiifolia L.	Danube	Danube	Begeč	45.2204	19.6166	Anđelković, A.
Ambrosia artemisiifolia L.	Danube	Danube	Vinča	44.769	20.6188	Anđelković, A.
Ambrosia artemisiifolia L.	Danube	Danube	Ritopek	44.7385	20.6591	Anđelković, A.
Ambrosia artemisiifolia L.	Danube	Danube	Grocka	44.6801	20.7176	Anđelković, A.
Ambrosia artemisiifolia L.	Danube	Danube	Smederevo	44.6684	20.9235	Anđelković, A.
Ambrosia artemisiifolia L.	Danube	Danube	Srebrno jezero	44.773	21.4666	Anđelković, A.
Ambrosia artemisiifolia L.	Danube	Danube	Golubac	44.6529	21.6389	Anđelković, A.
Ambrosia artemisiifolia L.	Danube	Jegrička	Ravno Selo	45.4532	19.6142	Anđelković, A.
Ambrosia artemisiifolia L.	Danube	Jegrička	Temerin	45.4672	19.9136	Anđelković, A.
Ambrosia artemisiifolia L.	Danube	Jegrička	Gospođinci	45.4182	19.9998	Anđelković, A.
Ambrosia artemisiifolia L.	Danube	Karaš	Kuštilj	45.0341	21.3819	Anđelković, A.
Ambrosia artemisiifolia L.	Danube	Karaš	Vojvodinci	45.0155	21.3528	Anđelković, A.
Ambrosia artemisiifolia L.	Danube	Karaš	Dobričevo	44.9944	21.3522	Anđelković, A.
Ambrosia artemisiifolia L.	Danube	Karaš	Jasenovo	44.94	21.2922	Anđelković, A.
Ambrosia artemisiifolia L.	Danube	Karaš	Dupljaja	44.9277	21.2673	Anđelković, A.
Ambrosia artemisiifolia L.	Danube	Krivaja	Srbobran1	45.5604	19.7841	Anđelković, A.
Ambrosia artemisiifolia L.	Danube	Krivaja	Srbobran 2	45.552	19.7966	Anđelković, A.
Ambrosia artemisiifolia L.	Danube	Mlava	Izvarica - Ribare	44.2292	21.6905	Anđelković, A.
Ambrosia artemisiifolia L.	Danube	Mlava	Šetonje	44.2826	21.5094	Anđelković, A.
Ambrosia artemisiifolia L.	Danube	Mostonga	Sombor	45.7587	19.0987	Anđelković, A.
Ambrosia artemisiifolia L.	Danube	Nera	Kusić	44.871	21.473	Anđelković, A.
Ambrosia artemisiifolia L.	Danube	Nera	Kusić 2	44.8699	21.4398	Anđelković, A.
Ambrosia artemisiifolia L.	Danube	Nera	Vračev Gaj	44.8681	21.3704	Anđelković, A.
Ambrosia artemisiifolia L.	Danube	Rojga	Veliki Gaj	44.8681	21.3704	Anđelković, A.
Ambrosia artemisiifolia L.	Danube	Tamiš	Jabuka	44.9447	20.5971	Anđelković, A.
Ambrosia artemisiifolia L.	Danube	Tamiš	Glogonj	44.9767	20.5236	Anđelković, A.
Ambrosia artemisiifolia L.	Danube	Tamiš	Sefkerin	45.0041	20.468	Anđelković, A.
Ambrosia artemisiifolia L.	Danube	Tamiš	Orlovat	45.2368	20.5796	Anđelković, A.
Ambrosia artemisiifolia L.	Danube	Tamiš	Botoš	45.286	20.6343	Anđelković, A.
Ambrosia artemisiifolia L.	Danube	Tamiš	Sečanj	45.3581	20.7704	Anđelković, A.
Ambrosia artemisiifolia L.	Danube	Tamiš	Jaša Tomić	45.4439	20.8728	Anđelković, A.
Ambrosia artemisiifolia L.	Sava	Bosut	Morović	45.0204	19.2232	Anđelković, A.
Ambrosia artemisiifolia L.	Sava	Bosut	most na AP	45.0485	19.1728	Anđelković, A.
Ambrosia artemisiifolia L.	Sava	Bosut	Batrovci	45.0529	19.1237	Anđelković, A.
Ambrosia artemisiifolia L.	Sava	Sava	Hrtkovci	44.8898	19.7516	Anđelković, A.
Ambrosia artemisiifolia L.	Sava	Sava	Provo	44.6898	19.9094	Anđelković, A.
Ambrosia artemisiifolia L.	Sava	Sava	Šabac	44.7615	19.7068	Anđelković, A.
Ambrosia artemisiifolia L.	Sava	Sava	Obrenovac	44.6865	20.2029	Anđelković, A.
Ambrosia artemisiifolia L.	Sava	Sava	Ostružnica	44.727	20.3108	Anđelković, A.
Ambrosia artemisiifolia L.	Sava	Sava	Beograd - Ada	44.7727	20.3609	Anđelković, A.
Ambrosia artemisiifolia L.	Sava	Studva	Morović	45.0075	19.2168	Anđelković, A.
Ambrosia artemisiifolia L.	Sava	Topčiderska reka	Rakovica	44.7534	20.4465	Anđelković, A.
Ambrosia artemisiifolia L.	Sava	Topčiderska reka	Topčiderski park	44.7788	20.4395	Anđelković, A.
Ambrosia artemisiifolia L.	Kolubara	Gradac	Manastir Ćelije	44.2331	19.863	Anđelković, A.
Ambrosia artemisiifolia L.	Kolubara	Gradac	Gradska plaža	44.2555	19.888	Anđelković, A.
Ambrosia artemisiifolia L.	Kolubara	Gradac	Vajati	44.2458	19.8861	Anđelković, A.
Ambrosia artemisiifolia L.	Kolubara	Gradac	Degurić	44.2423	19.8888	Anđelković, A.
Ambrosia artemisiifolia L.	Kolubara	Kolubara	Ratkovac	44.339	20.0909	Anđelković, A.
Ambrosia artemisiifolia L.	Kolubara	Kolubara	Lajkovac	44.3563	20.1537	Anđelković, A.
Ambrosia artemisiifolia L.	Kolubara	Kolubara	Jabučje	44.4003	20.2105	Anđelković, A.
Ambrosia artemisiifolia L.	Kolubara	Kolubara	Cvetojevac	44.445	20.2652	Anđelković, A.
Ambrosia artemisiifolia L.	Kolubara	Kolubara	put ka Beloševcu	44.2687	19.9093	Anđelković, A.
Ambrosia artemisiifolia L.	Kolubara	Kolubara	Poljane	44.5678	20.2149	Anđelković, A.
Ambrosia artemisiifolia L.	Kolubara	Kolubara	Obrenovac	44.653	20.2173	Anđelković, A.
Ambrosia artemisiifolia L.	Kolubara	Ub	Dokmir	44.4149	19.9755	Anđelković, A.
Ambrosia artemisiifolia L.	Kolubara	Ub	Zvizdar	44.4285	20.0253	Anđelković, A.
Ambrosia artemisiifolia L.	Kolubara	Ub	Gunjevac	44.4483	20.0492	Anđelković, A.
Ambrosia artemisiifolia L.	Drina	Jadar	Lešnica	44.6845	19.3124	Anđelković, A.
Ambrosia artemisiifolia L.	Drina	Jadar	Jelav	44.6329	19.2738	Anđelković, A.
Ambrosia artemisiifolia L.	Drina	Jadar	Gajići	44.4702	19.4651	Anđelković, A.
Ambrosia artemisiifolia L.	Drina	Jadar	Komirić	44.4136	19.5377	Anđelković, A.
Ambrosia artemisiifolia L.	Drina	Štira	Zajača - pre	44.4457	19.2532	Anđelković, A.
Ambrosia artemisiifolia L.	Drina	Štira	Zajača - posle	44.4527	19.2453	Anđelković, A.
Ambrosia artemisiifolia L.	Drina	Štira	Paskovac	44.4812	19.235	Anđelković, A.
Ambrosia artemisiifolia L.	Drina	Štira	Voćnjak	44.5017	19.2515	Anđelković, A.
Ambrosia artemisiifolia L.	Drina	Štira	Viskoza	44.5432	19.1897	Anđelković, A.
Ambrosia artemisiifolia L.	Velika Morava	Resava	Dvorište	44.0959	21.5067	Anđelković, A.
Ambrosia artemisiifolia L.	Velika Morava	Resava	Plažane	44.1349	21.4017	Anđelković, A.
Ambrosia artemisiifolia L.	Velika Morava	Resava	Lukovica	44.2205	21.2581	Anđelković, A.
Ambrosia artemisiifolia L.	Zapadna Morava	Zapadna Morava	Mrčajevci	43.8332	20.503	Anđelković, A.
Ambrosia artemisiifolia L.	Zapadna Morava	Zapadna Morava	Kukljin	43.6024	21.2336	Anđelković, A.
Ambrosia artemisiifolia L.	Zapadna Morava	Zapadna Morava	Trstenik	43.6246	21.0167	Anđelković, A.
Ambrosia artemisiifolia L.	Zapadna Morava	Zapadna Morava	Vrnjci	43.6539	20.9225	Anđelković, A.
Ambrosia artemisiifolia L.	Zapadna Morava	Zapadna Morava	Medveđa	43.6252	21.0742	Anđelković, A.
Ambrosia artemisiifolia L.	Zapadna Morava	Ribnica	Dragosinci	43.6371	20.7023	Anđelković, A.
Ambrosia artemisiifolia L.	Zapadna Morava	Ribnica	Kamenica	43.612	20.7013	Anđelković, A.
Ambrosia artemisiifolia L.	Zapadna Morava	Čemernica	Trbušani	43.9367	20.3033	Anđelković, A.
Ambrosia artemisiifolia L.	Južna Morava	Vlasina	Vlasotince	42.9613	22.1399	Anđelković, A.
Ambrosia artemisiifolia L.	Južna Morava	Južna Morava	Stalać	43.6769	21.4111	Anđelković, A.
Ambrosia artemisiifolia L.	Južna Morava	Kutinska reka	Donji Dušnik	43.1637	22.1113	Anđelković, A.
Ambrosia artemisiifolia L.	Južna Morava	Kutinska reka	Krastavče	43.1806	22.0447	Anđelković, A.
Ambrosia artemisiifolia L.	Južna Morava	Kutinska reka	Kutin	43.277	21.9862	Anđelković, A.
Ambrosia artemisiifolia L.	Timok	Crni Timok	Gamzigradska banja	43.9241	22.1717	Anđelković, A.
Ambrosia artemisiifolia L.	Danube-Tisa-Danube hydrosystem	Banatska Palanka - Novi Bečej	Botoš	45.3183	20.6386	Anđelković, A.
Ambrosia artemisiifolia L.	Danube-Tisa-Danube hydrosystem	Banatska Palanka - Novi Bečej	Grebenac	44.9024	21.2468	Anđelković, A.
Ambrosia artemisiifolia L.	Danube-Tisa-Danube hydrosystem	Bečej-Bogojevo	Odžaci - S. Miletić	45.5344	19.239	Anđelković, A.
Ambrosia artemisiifolia L.	Danube-Tisa-Danube hydrosystem	Bečej-Bogojevo	Lalić - Ruski Krstur most	45.5378	19.3815	Anđelković, A.
Ambrosia artemisiifolia L.	Danube-Tisa-Danube hydrosystem	Bečej-Bogojevo	Kula	45.603	19.5529	Anđelković, A.
Ambrosia artemisiifolia L.	Danube-Tisa-Danube hydrosystem	Bečej-Bogojevo	Srbobran	45.5411	19.7898	Anđelković, A.
Ambrosia artemisiifolia L.	Danube-Tisa-Danube hydrosystem	Karavukovo - Bački Petrovac	Bač ulaz	45.3737	19.2654	Anđelković, A.
Ambrosia artemisiifolia L.	Danube-Tisa-Danube hydrosystem	Novi Sad - Savino Selo	Savino Selo	45.4948	19.5236	Anđelković, A.
Ambrosia artemisiifolia L.	Danube-Tisa-Danube hydrosystem	Novi Sad - Savino Selo	Kulpin	45.3882	19.5839	Anđelković, A.
Ambrosia artemisiifolia L.	Danube-Tisa-Danube hydrosystem	Novi Sad - Savino Selo	Rumenka	45.3019	19.7421	Anđelković, A.
Ambrosia artemisiifolia L.	Danube-Tisa-Danube hydrosystem	Veliki Bački kanal	Sombor	45.7363	19.1397	Anđelković, A.
Ambrosia artemisiifolia L.	Danube-Tisa-Danube hydrosystem	Veliki Bački kanal	Apatin 1	45.7071	19.0045	Anđelković, A.
Ambrosia artemisiifolia L.	Danube-Tisa-Danube hydrosystem	Kikindski kanal	Bašaid	45.6237	20.3033	Anđelković, A.

## Sheet: Table 6_AMHFR
Supplementary file 2 Geographical distribution data of the studied invasive alien speces. Anđelković et al. "Riparian areas as conduits of plant invasions in Serbia (Middle Danube Basin area)"
Species	Locality (catchment area)	Locality (river/canal section)	Locality (city/village)	Latitude	Longitude	Recorded by
Amorpha fruticosa L.	Danube	Begej	Mužlja	45.3595	20.3995	Anđelković, A.
Amorpha fruticosa L.	Danube	Begej	Klek	45.4401	20.4578	Anđelković, A.
Amorpha fruticosa L.	Danube	Danube	Novi Sad	45.2289	19.8326	Anđelković, A.
Amorpha fruticosa L.	Danube	Danube	Sremski Karlovci	45.204	19.9426	Anđelković, A.
Amorpha fruticosa L.	Danube	Danube	Bačko Novo Selo	45.2855	19.138	Anđelković, A.
Amorpha fruticosa L.	Danube	Danube	Begeč	45.2204	19.6166	Anđelković, A.
Amorpha fruticosa L.	Danube	Danube	Stari Slankamen	45.1448	20.2565	Anđelković, A.
Amorpha fruticosa L.	Danube	Danube	Belegiš	45.0239	20.3536	Anđelković, A.
Amorpha fruticosa L.	Danube	Danube	Zemun	44.8502	20.4097	Anđelković, A.
Amorpha fruticosa L.	Danube	Danube	Vinča	44.769	20.6188	Anđelković, A.
Amorpha fruticosa L.	Danube	Danube	Ritopek	44.7385	20.6591	Anđelković, A.
Amorpha fruticosa L.	Danube	Danube	Grocka	44.6801	20.7176	Anđelković, A.
Amorpha fruticosa L.	Danube	Danube	Kovin - Malo Bavanište	44.7272	21.0194	Anđelković, A.
Amorpha fruticosa L.	Danube	Danube	Banatska Palanka	45.2342	19.3809	Anđelković, A.
Amorpha fruticosa L.	Danube	Danube	Dubovac	44.7886	21.2135	Anđelković, A.
Amorpha fruticosa L.	Danube	Danube	Orešac	44.6554	20.8196	Anđelković, A.
Amorpha fruticosa L.	Danube	Danube	Smederevo	44.6684	20.9235	Anđelković, A.
Amorpha fruticosa L.	Danube	Danube	Ram	44.8161	21.3332	Anđelković, A.
Amorpha fruticosa L.	Danube	Danube	Vinci	44.6989	21.6045	Anđelković, A.
Amorpha fruticosa L.	Danube	Danube	Srebrno jezero	44.773	21.4666	Anđelković, A.
Amorpha fruticosa L.	Danube	Danube	Golubac	44.6529	21.6389	Anđelković, A.
Amorpha fruticosa L.	Danube	Zlatica	Sajan - Padej	45.8372	20.2059	Anđelković, A.
Amorpha fruticosa L.	Danube	Jegrička	Ravno Selo	45.4532	19.6142	Anđelković, A.
Amorpha fruticosa L.	Danube	Jegrička	Sirig	45.4553	19.8091	Anđelković, A.
Amorpha fruticosa L.	Danube	Karaš	Kuštilj	45.0341	21.3819	Anđelković, A.
Amorpha fruticosa L.	Danube	Karaš	Vojvodinci	45.0155	21.3528	Anđelković, A.
Amorpha fruticosa L.	Danube	Karaš	Dobričevo	44.9944	21.3522	Anđelković, A.
Amorpha fruticosa L.	Danube	Karaš	Straža	44.9627	21.3161	Anđelković, A.
Amorpha fruticosa L.	Danube	Karaš	Jasenovo	44.94	21.2922	Anđelković, A.
Amorpha fruticosa L.	Danube	Karaš	Dupljaja	44.9277	21.2673	Anđelković, A.
Amorpha fruticosa L.	Danube	Mostonga	Prigrevica	45.6765	19.1212	Anđelković, A.
Amorpha fruticosa L.	Danube	Mostonga	Sombor	45.7587	19.0987	Anđelković, A.
Amorpha fruticosa L.	Danube	Nera	Kusić	44.871	21.473	Anđelković, A.
Amorpha fruticosa L.	Danube	Nera	Kusić 2	44.8699	21.4398	Anđelković, A.
Amorpha fruticosa L.	Danube	Nera	Bela Crkva	44.8728	21.4257	Anđelković, A.
Amorpha fruticosa L.	Danube	Nera	Vračev Gaj	44.8681	21.3704	Anđelković, A.
Amorpha fruticosa L.	Danube	Nera	Stara Palanka	44.833	21.3547	Anđelković, A.
Amorpha fruticosa L.	Danube	Tamiš	Pančevo	44.8707	20.6322	Anđelković, A.
Amorpha fruticosa L.	Danube	Tamiš	Jabuka	44.9447	20.5971	Anđelković, A.
Amorpha fruticosa L.	Danube	Tamiš	Glogonj	44.9767	20.5236	Anđelković, A.
Amorpha fruticosa L.	Danube	Tamiš	Sefkerin	45.0041	20.468	Anđelković, A.
Amorpha fruticosa L.	Danube	Tamiš	Opovo	45.0511	20.4187	Anđelković, A.
Amorpha fruticosa L.	Danube	Tamiš	Orlovat	45.2368	20.5796	Anđelković, A.
Amorpha fruticosa L.	Danube	Tamiš	Botoš	45.286	20.6343	Anđelković, A.
Amorpha fruticosa L.	Danube	Tamiš	Sečanj	45.3581	20.7704	Anđelković, A.
Amorpha fruticosa L.	Danube	Tamiš	Jaša Tomić	45.4439	20.8728	Anđelković, A.
Amorpha fruticosa L.	Danube	Tisa	Bečej	45.6095	20.058	Anđelković, A.
Amorpha fruticosa L.	Danube	Tisa	Most ZR - Žabalj	45.3933	20.2053	Anđelković, A.
Amorpha fruticosa L.	Danube	Tisa	Titel	45.1994	20.3118	Anđelković, A.
Amorpha fruticosa L.	Danube	Tisa	Kanjiža	46.0733	20.0585	Anđelković, A.
Amorpha fruticosa L.	Sava	Bosut	Morović	45.0204	19.2232	Anđelković, A.
Amorpha fruticosa L.	Sava	Bosut	most na AP	45.0485	19.1728	Anđelković, A.
Amorpha fruticosa L.	Sava	Bosut	kanal Smogva	45.0746	19.1455	Anđelković, A.
Amorpha fruticosa L.	Sava	Bosut	Batrovci	45.0529	19.1237	Anđelković, A.
Amorpha fruticosa L.	Sava	Sava	Barič - Umka	44.6608	20.281	Anđelković, A.
Amorpha fruticosa L.	Sava	Sava	Hrtkovci	44.8898	19.7516	Anđelković, A.
Amorpha fruticosa L.	Sava	Sava	Obrenovac	44.6865	20.2029	Anđelković, A.
Amorpha fruticosa L.	Sava	Sava	Ostružnica	44.727	20.3108	Anđelković, A.
Amorpha fruticosa L.	Sava	Sava	Beograd - Ada	44.7727	20.3609	Anđelković, A.
Amorpha fruticosa L.	Sava	Studva	Morović	45.0075	19.2168	Anđelković, A.
Amorpha fruticosa L.	Kolubara	Kolubara	Obrenovac	44.653	20.2173	Anđelković, A.
Amorpha fruticosa L.	Drina	Jadar	Lešnica	44.6845	19.3124	Anđelković, A.
Amorpha fruticosa L.	Drina	Jadar	Gornji Dobrić	44.5808	19.3004	Anđelković, A.
Amorpha fruticosa L.	Drina	Jadar	Komirić	44.4136	19.5377	Anđelković, A.
Amorpha fruticosa L.	Velika Morava	Resava	Dvorište	44.0959	21.5067	Anđelković, A.
Amorpha fruticosa L.	Velika Morava	Resava	Despotovac	44.097	21.4519	Anđelković, A.
Amorpha fruticosa L.	Velika Morava	Resava	Sedlare	44.1999	21.2899	Anđelković, A.
Amorpha fruticosa L.	Velika Morava	Resava	Lukovica	44.2205	21.2581	Anđelković, A.
Amorpha fruticosa L.	Velika Morava	Resava	Svilajnac	44.2327	21.1939	Anđelković, A.
Amorpha fruticosa L.	Zapadna Morava	Zapadna Morava	Stalać	43.6723	21.3965	Anđelković, A.
Amorpha fruticosa L.	Zapadna Morava	Zapadna Morava	Trstenik	43.6246	21.0167	Anđelković, A.
Amorpha fruticosa L.	Zapadna Morava	Zapadna Morava	Medveđa	43.6252	21.0742	Anđelković, A.
Amorpha fruticosa L.	Zapadna Morava	Ribnica	Trešnjar	43.6765	20.6905	Anđelković, A.
Amorpha fruticosa L.	Zapadna Morava	Ribnica	Kraljevo	43.7092	20.6959	Anđelković, A.
Amorpha fruticosa L.	Zapadna Morava	Čemernica	Preljina	43.9154	20.4001	Anđelković, A.
Amorpha fruticosa L.	Južna Morava	Vlasina	Stajkovce	42.983	22.0598	Anđelković, A.
Amorpha fruticosa L.	Južna Morava	Vlasina	Svođe	42.9751	22.2646	Anđelković, A.
Amorpha fruticosa L.	Južna Morava	Kutinska reka	Taskovići	43.237	22.017	Anđelković, A.
Amorpha fruticosa L.	Južna Morava	Nišava	Popovac	43.3305	21.8223	Anđelković, A.
Amorpha fruticosa L.	Južna Morava	Nišava	Niš	43.3204	21.9478	Anđelković, A.
Amorpha fruticosa L.	Južna Morava	Nišava	Prosek	43.3079	22.0325	Anđelković, A.
Amorpha fruticosa L.	Južna Morava	Nišava	Krupac	43.2937	22.2213	Anđelković, A.
Amorpha fruticosa L.	Južna Morava	Nišava	Moklište	43.2444	22.2666	Anđelković, A.
Amorpha fruticosa L.	Južna Morava	Nišava	Bela Palanka	43.2322	22.3206	Anđelković, A.
Amorpha fruticosa L.	Južna Morava	Nišava	Crnoklište	43.2216	22.4624	Anđelković, A.
Amorpha fruticosa L.	Južna Morava	Nišava	Pirot	43.1443	22.604	Anđelković, A.
Amorpha fruticosa L.	Beli Drim	Pčinja	Manastir	42.3158	21.8909	Anđelković, A.
Amorpha fruticosa L.	Timok	Beli Timok	Grljan	43.8556	22.2972	Anđelković, A.
Amorpha fruticosa L.	Timok	Beli Timok	Mali Beograd	43.7908	22.3085	Anđelković, A.
Amorpha fruticosa L.	Timok	Beli Timok	Borovac	43.7378	22.2982	Anđelković, A.
Amorpha fruticosa L.	Timok	Beli Timok	put ka Vrbici	43.7107	22.2844	Anđelković, A.
Amorpha fruticosa L.	Timok	Beli Timok	Debelica	43.6659	22.2656	Anđelković, A.
Amorpha fruticosa L.	Timok	Beli Timok	Ravna	43.6366	22.2671	Anđelković, A.
Amorpha fruticosa L.	Timok	Beli Timok	Knjaževac	43.5888	22.2628	Anđelković, A.
Amorpha fruticosa L.	Timok	Grliška reka	most	43.815	22.2851	Anđelković, A.
Amorpha fruticosa L.	Timok	Crni Timok	Zvezdan	43.8976	22.2157	Anđelković, A.
Amorpha fruticosa L.	Timok	Crni Timok	Gamzigradska banja	43.9241	22.1717	Anđelković, A.
Amorpha fruticosa L.	Danube-Tisa-Danube hydrosystem	Banatska Palanka - Novi Bečej	Botoš	45.3183	20.6386	Anđelković, A.
Amorpha fruticosa L.	Danube-Tisa-Danube hydrosystem	Banatska Palanka - Novi Bečej	Grebenac	44.9024	21.2468	Anđelković, A.
Amorpha fruticosa L.	Danube-Tisa-Danube hydrosystem	Banatska Palanka - Novi Bečej	Melenci	45.5427	20.3387	Anđelković, A.
Amorpha fruticosa L.	Danube-Tisa-Danube hydrosystem	Banatska Palanka - Novi Bečej	Straža	44.9741	21.2882	Anđelković, A.
Amorpha fruticosa L.	Danube-Tisa-Danube hydrosystem	Banatska Palanka - Novi Bečej	Jermenovci - Janošik	45.1811	21.029	Anđelković, A.
Amorpha fruticosa L.	Danube-Tisa-Danube hydrosystem	Banatska Palanka - Novi Bečej	Potporanj	45.0206	21.2502	Anđelković, A.
Amorpha fruticosa L.	Danube-Tisa-Danube hydrosystem	Banatska Palanka - Novi Bečej	Vlajkovac	45.0697	21.1921	Anđelković, A.
Amorpha fruticosa L.	Danube-Tisa-Danube hydrosystem	Banatska Palanka - Novi Bečej	Lazarevo	45.387	20.4945	Anđelković, A.
Amorpha fruticosa L.	Danube-Tisa-Danube hydrosystem	Banatska Palanka - Novi Bečej	Klek	45.4072	20.4628	Anđelković, A.
Amorpha fruticosa L.	Danube-Tisa-Danube hydrosystem	Banatska Palanka - Novi Bečej	Novi Bečej	45.5977	20.2036	Anđelković, A.
Amorpha fruticosa L.	Danube-Tisa-Danube hydrosystem	Novi Sad - Savino Selo	Novi Sad	45.2742	19.8492	Anđelković, A.
Amorpha fruticosa L.	Danube-Tisa-Danube hydrosystem	Veliki Bački kanal	Apatin 1	45.7071	19.0045	Anđelković, A.
Amorpha fruticosa L.	Danube-Tisa-Danube hydrosystem	Kikindski kanal	Kikinda	45.822	20.4159	Anđelković, A.
Amorpha fruticosa L.	Danube-Tisa-Danube hydrosystem	Kikindski kanal	Bašaid	45.6237	20.3033	Anđelković, A.

## Sheet: Table 7_ASCSY
Supplementary file 2 Geographical distribution data of the studied invasive alien speces. Anđelković et al. "Riparian areas as conduits of plant invasions in Serbia (Middle Danube Basin area)"
Species	Locality (catchment area)	Locality (river/canal section)	Locality (city/village)	Latitude	Longitude	Recorded by
Asclepias syriaca L.	Danube	Mostonga	Prigrevica	45.6765	19.1212	Anđelković, A.
Asclepias syriaca L.	Danube	Nera	Vračev Gaj	44.8681	21.3704	Anđelković, A.
Asclepias syriaca L.	Sava	Studva	Morović	45.0075	19.2168	Anđelković, A.
Asclepias syriaca L.	Danube-Tisa-Danube hydrosystem	Banatska Palanka - Novi Bečej	Melenci	45.5427	20.3387	Anđelković, A.
Asclepias syriaca L.	Danube-Tisa-Danube hydrosystem	Novi Sad - Savino Selo	Kulpin	45.3882	19.5839	Anđelković, A.
Asclepias syriaca L.	Danube-Tisa-Danube hydrosystem	Novi Sad - Savino Selo	Novi Sad	45.2742	19.8492	Anđelković, A.

## Sheet: Table 8_BRNPA
Supplementary file 2 Geographical distribution data of the studied invasive alien speces. Anđelković et al. "Riparian areas as conduits of plant invasions in Serbia (Middle Danube Basin area)"
Species	Locality (catchment area)	Locality (river/canal section)	Locality (city/village)	Latitude	Longitude	Recorded by
Broussonetia papyrifera (L.) Vent.	Danube	Dunav	Novi Banovci	44.9605	20.2853	Anđelković, A.
Broussonetia papyrifera (L.) Vent.	Danube	Dunav	Grocka	44.6801	20.7176	Anđelković, A.
Broussonetia papyrifera (L.) Vent.	Sava	Sava	Obrenovac	44.6865	20.2029	Anđelković, A.
Broussonetia papyrifera (L.) Vent.	Velika Morava	Crnica	Bošnjane	43.8844	21.4815	Anđelković, A.
Broussonetia papyrifera (L.) Vent.	Danube-Tisa-Danube hydrosystem	Karavukovo - Bački Petrovac	Tovariševo	45.3719	19.3316	Anđelković, A.
Broussonetia papyrifera (L.) Vent.	Danube-Tisa-Danube hydrosystem	Novi Sad - Savino Selo	Rumenka	45.3019	19.7421	Anđelković, A.

## Sheet: Table 9_DATST
Supplementary file 2 Geographical distribution data of the studied invasive alien speces. Anđelković et al. "Riparian areas as conduits of plant invasions in Serbia (Middle Danube Basin area)"
Species	Locality (catchment area)	Locality (river/canal section)	Locality (city/village)	Latitude	Longitude	Recorded by
Datura stramonium L.	Danube	Dunav	Novi Banovci	44.9605	20.2853	Anđelković, A.
Datura stramonium L.	Danube	Dunav	Zemun	44.8502	20.4097	Anđelković, A.
Datura stramonium L.	Danube	Dunav	Orešac	44.6554	20.8196	Anđelković, A.
Datura stramonium L.	Danube	Jegrička	Ravno Selo	45.4532	19.6142	Anđelković, A.
Datura stramonium L.	Danube	Jegrička	Sirig	45.4553	19.8091	Anđelković, A.
Datura stramonium L.	Danube	Krivaja	Srbobran1	45.5604	19.7841	Anđelković, A.
Datura stramonium L.	Danube	Mlava	Izvarica - Ribare	44.2292	21.6905	Anđelković, A.
Datura stramonium L.	Danube	Mostonga	Prigrevica	45.6765	19.1212	Anđelković, A.
Datura stramonium L.	Danube	Nera	Stara Palanka	44.833	21.3547	Anđelković, A.
Datura stramonium L.	Danube	Tamiš	Sečanj	45.3581	20.7704	Anđelković, A.
Datura stramonium L.	Kolubara	Kolubara	Jabučje	44.4003	20.2105	Anđelković, A.
Datura stramonium L.	Velika Morava	Resava	Plažane	44.1349	21.4017	Anđelković, A.
Datura stramonium L.	Zapadna Morava	Zapadna Morava	Čukojevac	43.7064	20.8289	Anđelković, A.
Datura stramonium L.	Zapadna Morava	Zapadna Morava	Vrnjci	43.6539	20.9225	Anđelković, A.
Datura stramonium L.	Južna Morava	Toplica	Vlahovo	43.2111	21.6478	Anđelković, A.
Datura stramonium L.	Danube-Tisa-Danube hydrosystem	Banatska Palanka - Novi Bečej	Botoš	45.3183	20.6386	Anđelković, A.

## Sheet: Table 10_ECHCG
Supplementary file 2 Geographical distribution data of the studied invasive alien speces. Anđelković et al. "Riparian areas as conduits of plant invasions in Serbia (Middle Danube Basin area)"
Species	Locality (catchment area)	Locality (river/canal section)	Locality (city/village)	Latitude	Longitude	Recorded by
Echinochloa crus-galli (L.) P. Beauv.	Danube	Begej	Itebej	45.5581	20.7165	Anđelković, A.
Echinochloa crus-galli (L.) P. Beauv.	Danube	Begej	Mužlja	45.3595	20.3995	Anđelković, A.
Echinochloa crus-galli (L.) P. Beauv.	Danube	Begej	Torak	45.5119	20.604	Anđelković, A.
Echinochloa crus-galli (L.) P. Beauv.	Danube	Begej	Klek	45.4401	20.4578	Anđelković, A.
Echinochloa crus-galli (L.) P. Beauv.	Danube	Danube	Sremski Karlovci	45.204	19.9426	Anđelković, A.
Echinochloa crus-galli (L.) P. Beauv.	Danube	Danube	Bačko Novo Selo	45.2855	19.138	Anđelković, A.
Echinochloa crus-galli (L.) P. Beauv.	Danube	Danube	Begeč	45.2204	19.6166	Anđelković, A.
Echinochloa crus-galli (L.) P. Beauv.	Danube	Danube	Stari Slankamen	45.1448	20.2565	Anđelković, A.
Echinochloa crus-galli (L.) P. Beauv.	Danube	Danube	Belegiš	45.0239	20.3536	Anđelković, A.
Echinochloa crus-galli (L.) P. Beauv.	Danube	Danube	Zemun	44.8502	20.4097	Anđelković, A.
Echinochloa crus-galli (L.) P. Beauv.	Danube	Danube	Vinča	44.769	20.6188	Anđelković, A.
Echinochloa crus-galli (L.) P. Beauv.	Danube	Danube	Ritopek	44.7385	20.6591	Anđelković, A.
Echinochloa crus-galli (L.) P. Beauv.	Danube	Danube	Kovin - Malo Bavanište	44.7272	21.0194	Anđelković, A.
Echinochloa crus-galli (L.) P. Beauv.	Danube	Danube	Banatska Palanka	45.2342	19.3809	Anđelković, A.
Echinochloa crus-galli (L.) P. Beauv.	Danube	Danube	Dubovac	44.7886	21.2135	Anđelković, A.
Echinochloa crus-galli (L.) P. Beauv.	Danube	Danube	Orešac	44.6554	20.8196	Anđelković, A.
Echinochloa crus-galli (L.) P. Beauv.	Danube	Danube	Smederevo	44.6684	20.9235	Anđelković, A.
Echinochloa crus-galli (L.) P. Beauv.	Danube	Jegrička	Ravno Selo	45.4532	19.6142	Anđelković, A.
Echinochloa crus-galli (L.) P. Beauv.	Danube	Jegrička	Sirig	45.4553	19.8091	Anđelković, A.
Echinochloa crus-galli (L.) P. Beauv.	Danube	Jegrička	Temerin	45.4672	19.9136	Anđelković, A.
Echinochloa crus-galli (L.) P. Beauv.	Danube	Jegrička	Gospođinci	45.4182	19.9998	Anđelković, A.
Echinochloa crus-galli (L.) P. Beauv.	Danube	Karaš	Kuštilj	45.0341	21.3819	Anđelković, A.
Echinochloa crus-galli (L.) P. Beauv.	Danube	Karaš	Dobričevo	44.9944	21.3522	Anđelković, A.
Echinochloa crus-galli (L.) P. Beauv.	Danube	Karaš	Jasenovo	44.94	21.2922	Anđelković, A.
Echinochloa crus-galli (L.) P. Beauv.	Danube	Karaš	Dupljaja	44.9277	21.2673	Anđelković, A.
Echinochloa crus-galli (L.) P. Beauv.	Danube	Krivaja	Srbobran1	45.5604	19.7841	Anđelković, A.
Echinochloa crus-galli (L.) P. Beauv.	Danube	Krivaja	Srbobran 2	45.552	19.7966	Anđelković, A.
Echinochloa crus-galli (L.) P. Beauv.	Danube	Krivaja	Bačka Topola	45.8094	19.631	Anđelković, A.
Echinochloa crus-galli (L.) P. Beauv.	Danube	Mlava	Izvarica - Ribare	44.2292	21.6905	Anđelković, A.
Echinochloa crus-galli (L.) P. Beauv.	Danube	Mlava	Šetonje	44.2826	21.5094	Anđelković, A.
Echinochloa crus-galli (L.) P. Beauv.	Danube	Mlava	Malo Crniće	44.5444	21.2792	Anđelković, A.
Echinochloa crus-galli (L.) P. Beauv.	Danube	Nera	Kusić	44.871	21.473	Anđelković, A.
Echinochloa crus-galli (L.) P. Beauv.	Danube	Nera	Stara Palanka	44.833	21.3547	Anđelković, A.
Echinochloa crus-galli (L.) P. Beauv.	Danube	Tamiš	Pančevo	44.8707	20.6322	Anđelković, A.
Echinochloa crus-galli (L.) P. Beauv.	Danube	Tamiš	Jabuka	44.9447	20.5971	Anđelković, A.
Echinochloa crus-galli (L.) P. Beauv.	Danube	Tamiš	Sefkerin	45.0041	20.468	Anđelković, A.
Echinochloa crus-galli (L.) P. Beauv.	Danube	Tamiš	Opovo	45.0511	20.4187	Anđelković, A.
Echinochloa crus-galli (L.) P. Beauv.	Danube	Tamiš	Sečanj	45.3581	20.7704	Anđelković, A.
Echinochloa crus-galli (L.) P. Beauv.	Danube	Tamiš	Jaša Tomić	45.4439	20.8728	Anđelković, A.
Echinochloa crus-galli (L.) P. Beauv.	Danube	Tisa	Ada	45.7992	20.1478	Anđelković, A.
Echinochloa crus-galli (L.) P. Beauv.	Danube	Tisa	Bečej	45.6095	20.058	Anđelković, A.
Echinochloa crus-galli (L.) P. Beauv.	Danube	Tisa	bridge Zrenjanin - Žabalj	45.3933	20.2053	Anđelković, A.
Echinochloa crus-galli (L.) P. Beauv.	Danube	Tisa	Titel	45.1994	20.3118	Anđelković, A.
Echinochloa crus-galli (L.) P. Beauv.	Danube	Tisa	Senta	45.9345	20.0915	Anđelković, A.
Echinochloa crus-galli (L.) P. Beauv.	Sava	Bosut	Morović	45.0204	19.2232	Anđelković, A.
Echinochloa crus-galli (L.) P. Beauv.	Sava	Bosut	Batrovci	45.0529	19.1237	Anđelković, A.
Echinochloa crus-galli (L.) P. Beauv.	Sava	Sava	Barič - Umka	44.6608	20.281	Anđelković, A.
Echinochloa crus-galli (L.) P. Beauv.	Sava	Sava	Hrtkovci	44.8898	19.7516	Anđelković, A.
Echinochloa crus-galli (L.) P. Beauv.	Sava	Sava	Provo	44.6898	19.9094	Anđelković, A.
Echinochloa crus-galli (L.) P. Beauv.	Sava	Sava	Sremska Mitrovica	44.9616	19.6132	Anđelković, A.
Echinochloa crus-galli (L.) P. Beauv.	Sava	Sava	Šabac	44.7615	19.7068	Anđelković, A.
Echinochloa crus-galli (L.) P. Beauv.	Sava	Sava	Obrenovac	44.6865	20.2029	Anđelković, A.
Echinochloa crus-galli (L.) P. Beauv.	Sava	Sava	Ostružnica	44.727	20.3108	Anđelković, A.
Echinochloa crus-galli (L.) P. Beauv.	Kolubara	Kolubara	Lajkovac	44.3563	20.1537	Anđelković, A.
Echinochloa crus-galli (L.) P. Beauv.	Kolubara	Kolubara	Divci	44.2903	20.0479	Anđelković, A.
Echinochloa crus-galli (L.) P. Beauv.	Kolubara	Kolubara	road to Beloševac	44.2687	19.9093	Anđelković, A.
Echinochloa crus-galli (L.) P. Beauv.	Kolubara	Kolubara	Poljane	44.5678	20.2149	Anđelković, A.
Echinochloa crus-galli (L.) P. Beauv.	Kolubara	Kolubara	Obrenovac	44.653	20.2173	Anđelković, A.
Echinochloa crus-galli (L.) P. Beauv.	Kolubara	Ub	Dokmir	44.4149	19.9755	Anđelković, A.
Echinochloa crus-galli (L.) P. Beauv.	Kolubara	Ub	Zvizdar	44.4285	20.0253	Anđelković, A.
Echinochloa crus-galli (L.) P. Beauv.	Kolubara	Ub	Gunjevac	44.4483	20.0492	Anđelković, A.
Echinochloa crus-galli (L.) P. Beauv.	Kolubara	Ub	Stublenica	44.4747	20.1018	Anđelković, A.
Echinochloa crus-galli (L.) P. Beauv.	Kolubara	Ub	Šarbane	44.49	20.1195	Anđelković, A.
Echinochloa crus-galli (L.) P. Beauv.	Drina	Jadar	Lešnica	44.6845	19.3124	Anđelković, A.
Echinochloa crus-galli (L.) P. Beauv.	Drina	Jadar	Jelav	44.6329	19.2738	Anđelković, A.
Echinochloa crus-galli (L.) P. Beauv.	Drina	Jadar	Draginac	44.5053	19.4124	Anđelković, A.
Echinochloa crus-galli (L.) P. Beauv.	Drina	Jadar	Zavlaka	44.4495	19.488	Anđelković, A.
Echinochloa crus-galli (L.) P. Beauv.	Drina	Jadar	Komirić	44.4136	19.5377	Anđelković, A.
Echinochloa crus-galli (L.) P. Beauv.	Drina	Jadar	Osečina	44.3716	19.5977	Anđelković, A.
Echinochloa crus-galli (L.) P. Beauv.	Drina	Lim	Kolovrat	43.3729	19.6304	Anđelković, A.
Echinochloa crus-galli (L.) P. Beauv.	Drina	Štira	before Zajača	44.4457	19.2532	Anđelković, A.
Echinochloa crus-galli (L.) P. Beauv.	Drina	Štira	after Zajača	44.4527	19.2453	Anđelković, A.
Echinochloa crus-galli (L.) P. Beauv.	Velika Morava	Crnica	Bošnjane	43.8844	21.4815	Anđelković, A.
Echinochloa crus-galli (L.) P. Beauv.	Velika Morava	Resava	Dvorište	44.0959	21.5067	Anđelković, A.
Echinochloa crus-galli (L.) P. Beauv.	Velika Morava	Resava	Despotovac	44.097	21.4519	Anđelković, A.
Echinochloa crus-galli (L.) P. Beauv.	Velika Morava	Resava	Medveđa	44.1516	21.352	Anđelković, A.
Echinochloa crus-galli (L.) P. Beauv.	Velika Morava	Resava	Lukovica	44.2205	21.2581	Anđelković, A.
Echinochloa crus-galli (L.) P. Beauv.	Zapadna Morava	Zapadna Morava	Čukojevac	43.7064	20.8289	Anđelković, A.
Echinochloa crus-galli (L.) P. Beauv.	Zapadna Morava	Zapadna Morava	Oplanići	43.7663	20.6646	Anđelković, A.
Echinochloa crus-galli (L.) P. Beauv.	Zapadna Morava	Zapadna Morava	Mrčajevci	43.8332	20.503	Anđelković, A.
Echinochloa crus-galli (L.) P. Beauv.	Zapadna Morava	Zapadna Morava	Čačak	43.8985	20.3502	Anđelković, A.
Echinochloa crus-galli (L.) P. Beauv.	Zapadna Morava	Zapadna Morava	Riđage	43.8993	20.2735	Anđelković, A.
Echinochloa crus-galli (L.) P. Beauv.	Zapadna Morava	Zapadna Morava	Ovčar Banja	43.8965	20.1861	Anđelković, A.
Echinochloa crus-galli (L.) P. Beauv.	Zapadna Morava	Zapadna Morava	Šanac	43.6206	21.3471	Anđelković, A.
Echinochloa crus-galli (L.) P. Beauv.	Zapadna Morava	Zapadna Morava	Kukljin	43.6024	21.2336	Anđelković, A.
Echinochloa crus-galli (L.) P. Beauv.	Zapadna Morava	Zapadna Morava	Trstenik	43.6246	21.0167	Anđelković, A.
Echinochloa crus-galli (L.) P. Beauv.	Zapadna Morava	Zapadna Morava	Vrnjci	43.6539	20.9225	Anđelković, A.
Echinochloa crus-galli (L.) P. Beauv.	Zapadna Morava	Zapadna Morava	Medveđa	43.6252	21.0742	Anđelković, A.
Echinochloa crus-galli (L.) P. Beauv.	Zapadna Morava	Ribnica	Trešnjar	43.6765	20.6905	Anđelković, A.
Echinochloa crus-galli (L.) P. Beauv.	Zapadna Morava	Čemernica	Ljubić	43.9203	20.3747	Anđelković, A.
Echinochloa crus-galli (L.) P. Beauv.	Zapadna Morava	Čemernica	Miokovci	43.9557	20.275	Anđelković, A.
Echinochloa crus-galli (L.) P. Beauv.	Južna Morava	Vlasina	Donji Dejan	42.9797	22.2079	Anđelković, A.
Echinochloa crus-galli (L.) P. Beauv.	Južna Morava	Vlasina	Svođe	42.9751	22.2646	Anđelković, A.
Echinochloa crus-galli (L.) P. Beauv.	Južna Morava	Kutinska reka	Gadžin Han	43.1946	22.0226	Anđelković, A.
Echinochloa crus-galli (L.) P. Beauv.	Južna Morava	Kutinska reka	Taskovići	43.237	22.017	Anđelković, A.
Echinochloa crus-galli (L.) P. Beauv.	Južna Morava	Nišava	Prosek	43.3079	22.0325	Anđelković, A.
Echinochloa crus-galli (L.) P. Beauv.	Južna Morava	Nišava	Krupac	43.2937	22.2213	Anđelković, A.
Echinochloa crus-galli (L.) P. Beauv.	Južna Morava	Toplica	Vlahovo	43.2111	21.6478	Anđelković, A.
Echinochloa crus-galli (L.) P. Beauv.	Beli Drim	Pčinja	Manastir	42.3158	21.8909	Anđelković, A.
Echinochloa crus-galli (L.) P. Beauv.	Beli Drim	Pčinja	Granični prelaz	42.3297	21.8942	Anđelković, A.
Echinochloa crus-galli (L.) P. Beauv.	Timok	Beli Timok	Grljan	43.8556	22.2972	Anđelković, A.
Echinochloa crus-galli (L.) P. Beauv.	Timok	Beli Timok	road to Vrbica	43.7107	22.2844	Anđelković, A.
Echinochloa crus-galli (L.) P. Beauv.	Timok	Beli Timok	Debelica	43.6659	22.2656	Anđelković, A.
Echinochloa crus-galli (L.) P. Beauv.	Timok	Beli Timok	Ravna	43.6366	22.2671	Anđelković, A.
Echinochloa crus-galli (L.) P. Beauv.	Timok	Crni Timok	Zaječar	43.9115	22.276	Anđelković, A.
Echinochloa crus-galli (L.) P. Beauv.	Timok	Crni Timok	Zvezdan	43.8976	22.2157	Anđelković, A.

[truncated: 16 more sheets: Table 11_ECNLO, Table 12_ELEIN, Table13_ERIAN, Table 14_ERICA, Table 15_FRAPE, Table 16_HELTU, Table 17_PRTQU, Table 18_PASDS, Table 19_PHYAM, Table 20_REYBO, Table 21_ROBPS, Table 22_SOLGI, Table 23_SORHA, Table 24_SYMSP, Table 25_XANST, Table 26_XANSP]
